# Supplementary material for: Incidence and Risk Factors of COVID-19-Associated Pulmonary Aspergillosis in Intensive Care Unit—A Monocentric Retrospective Observational Study
Source: MDPI journal article supplement (doi:10.3390/pathogens10111370), 2021-10-22

**Figure S1.** Kaplan-Meier Survival curves of COVID-19 patients in ICU during the 1st wave vs the 2nd wave, since hospitalization (a) and since ICU admission (b).

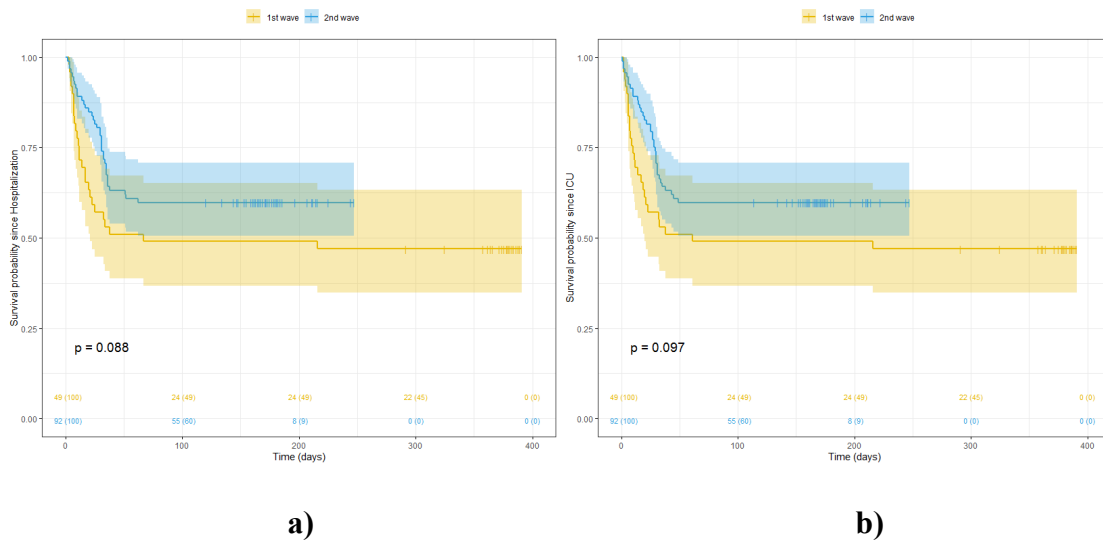

Supplement: s1 [file s1]
