# Supplementary material for: Incidence and Risk Factors of COVID-19-Associated Pulmonary Aspergillosis in Intensive Care Unit—A Monocentric Retrospective Observational Study
Source: MDPI journal article supplement (doi:10.3390/pathogens10111370), 2021-10-22
Supplement: s1 [file s1]

**Table S4.** Comparison of mortality in COVID-19 patients in ICU  
between the 1st wave and the 2nd wave.

| Wave     | Mortality     | Survival since ICU admission |         |
|----------|---------------|------------------------------|---------|
|          |               | P25 (days + 95%CI)           | p-value |
| 1st wave | 26/49 (53.1%) | 10.0 (6.0-20.0)              | 0.097   |
| 2nd wave | 37/92 (40.2%) | 28.5 (19.0-33.0)             |         |

CI = confidence interval; ICU = intensive care unit
