# Supplementary material for: Incidence and Risk Factors of COVID-19-Associated Pulmonary Aspergillosis in Intensive Care Unit—A Monocentric Retrospective Observational Study
Source: MDPI journal article supplement (doi:10.3390/pathogens10111370), 2021-10-22
Supplement: s1 [file s1]

**Table S3.** Risk factors of CAPA - univariate analysis

| Variable                          | Categories     | OR    | Univariate |         | Multivariate |           |         |
|-----------------------------------|----------------|-------|------------|---------|--------------|-----------|---------|
|                                   |                |       | 95% CI     | p-value | OR           | 95% CI    | p-value |
| Demographical variables           |                |       |            |         |              |           |         |
| Age (years)                       |                | 1.05  | 0.98-1.12  | 0.14    |              |           |         |
| BMI (kg/m²)                       |                | 0.97  | 0.86-1.10  | 0.66    |              |           |         |
| Sex                               | Women          | 1.33  | 0.32-5.62  | 0.69    |              |           |         |
| Wave                              | 2nd wave       | 11.3  | 0.62-203   | 0.10    | >999         | 2.89->999 | 0.021   |
| Comorbidities                     |                |       |            |         |              |           |         |
| Hypertension                      | Yes            | 7.30  | 0.89-60.1  | 0.064   | 5.10         | 0.70-37.3 | 0.11    |
| Cerebrovascular disease           | Yes            | 6.00  | 1.02-35.3  | 0.048   | 9.98         | 0.88-114  | 0.064   |
| Diabetes                          | Yes            | 1.50  | 0.38-5.84  | 0.56    |              |           |         |
| Thrombo-embolic disease           | Yes            | 1.02  | 0.04-24.6  | 0.99    |              |           |         |
| COPD                              | Yes            | 2.41  | 0.46-12.7  | 0.30    |              |           |         |
| Former TB                         | Yes            | 2.75  | 0.06-120   | 0.60    |              |           |         |
| Former Aspergillosis              | Yes            | 4.68  | 0.05-447   | 0.51    |              |           |         |
| HIV                               | Yes            | 2.75  | 0.06-120   | 0.60    |              |           |         |
| Obesity                           | Yes            | 0.3   | 0.06-1.57  | 0.16    |              |           |         |
| Cardiopathy                       | Yes            | 0.73  | 0.15-3.69  | 0.71    |              |           |         |
| Smoking                           |                |       |            | 0.92    |              |           |         |
|                                   | Former vs Non  | 0.53  | 0.02-11.8  |         |              |           |         |
|                                   | Active vs Non  | 0.92  | 0.23-3.62  |         |              |           |         |
| Alcoholism                        |                |       |            | 0.54    |              |           |         |
|                                   | Former vs Non  | 1.24  | 0.05-32.3  |         |              |           |         |
|                                   | Active vs Non  | 3.15  | 0.41-24.2  |         |              |           |         |
| Other pneumopathy                 | Yes            | 0.97  | 0.19-4.93  | 0.97    |              |           |         |
| CKD                               | Yes            | 1.53  | 0.17-13.4  | 0.70    |              |           |         |
| Hepatopathy                       | Yes            | 0.51  | 0.03-10.4  | 0.66    |              |           |         |
| Neoplasia                         | Yes            | 0.56  | 0.03-11.5  | 0.70    |              |           |         |
| Malignant hemopathy               | Yes            | 4.00  | 0.40-40.1  | 0.24    |              |           |         |
| Benign hemopathy                  | Yes            | 8.13  | 0.66-99.4  | 0.10    |              |           |         |
| Auto-immune disease               | Yes            | 1.38  | 0.16-12.0  | 0.77    |              |           |         |
| Immunodeficiency                  | Yes            | 2.75  | 0.06-120   | 0.60    |              |           |         |
| Immunosuppressive treatment       | Yes            | 5.10  | 0.89-29.2  | 0.067   | 0.35         | 0.04-3.51 | 0.37    |
| Treatment                         |                |       |            |         |              |           |         |
| Respiratory support               | MV vs Other    | 12.8  | 0.71-230   | 0.084   | 4.49         | 0.32-63.0 | 0.27    |
| Antibiotic at admission           | Yes            | 4.12  | 0.22-77.8  | 0.35    |              |           |         |
| AZT/ HCQ                          | AZT and/or HCQ | 0.088 | 0.01-1.58  | 0.099   | 94.9         | 0.55->999 | 0.084   |
| Remdesivir                        | Yes            | 1.22  | 0.05-31.1  | 0.90    |              |           |         |
| Dexamethasone                     | Yes            | 11.6  | 0.64-210   | 0.097   | 0.41         | 0.002-103 | 0.75    |
| Tocilizumab                       | Yes            | 2.75  | 0.06-120   | 0.60    |              |           |         |
| Siltuximab                        | Yes            | 4.68  | 0.05-447   | 0.51    |              |           |         |
| Anakinra                          | Yes            | 1.50  | 0.05-42.1  | 0.81    |              |           |         |
| Convalescent plasma               | Yes            | 3.18  | 0.33-30.5  | 0.32    |              |           |         |
| Other corticosteroids             | Yes            | 1.95  | 0.06-63.5  | 0.71    |              |           |         |
| Antibiotic during hospitalization | At least one   | 0.82  | 0.03-20.9  | 0.90    |              |           |         |

AZT = azithromycin; CAPA = COVID-19-associated pulmonary aspergillosis; CI = confidence interval; CKD = chronic kidney disease; COPD = chronic obstructive pulmonary disease; DXM = dexamethasone; HIV = human immunodeficiency virus; MV = mechanical ventilation; NA = not assessed; OR = odd ratio; TB = tuberculosis
