# Supplementary material for: Incidence and Risk Factors of COVID-19-Associated Pulmonary Aspergillosis in Intensive Care Unit—A Monocentric Retrospective Observational Study
Source: MDPI journal article supplement (doi:10.3390/pathogens10111370), 2021-10-22
Supplement: s1 [file s1]

**Table S1.** Demographic characteristic and comorbidities of the population

| Variable                     | Categories                 | N   | N (%)      | Mean | SD   | Min  | Q1   | Med  | Q3   | Max  |
|------------------------------|----------------------------|-----|------------|------|------|------|------|------|------|------|
| Age (years)                  |                            | 141 |            | 62.2 | 12.5 | 18.0 | 56.0 | 64.0 | 70.0 | 87.0 |
| BMI (kg/m <sup>2</sup> )     |                            | 120 |            | 30.4 | 6.1  | 21.2 | 26.1 | 29.0 | 33.0 | 57.8 |
|                              | [20; 25[                   |     | 17 (14.2)  |      |      |      |      |      |      |      |
|                              | [25; 30[                   |     | 48 (40.0)  |      |      |      |      |      |      |      |
|                              | [30; 35[                   |     | 36 (30.0)  |      |      |      |      |      |      |      |
|                              | [35; 40[                   |     | 13 (10.8)  |      |      |      |      |      |      |      |
|                              | ≥ 40                       |     | 6 (5.0)    |      |      |      |      |      |      |      |
| Sex                          |                            | 141 |            |      |      |      |      |      |      |      |
|                              | Men                        |     | 102 (72.3) |      |      |      |      |      |      |      |
|                              | Women                      |     | 39 (27.7)  |      |      |      |      |      |      |      |
| Wave                         |                            | 141 |            |      |      |      |      |      |      |      |
|                              | 1st wave                   |     | 49 (34.7)  |      |      |      |      |      |      |      |
|                              | 2nd wave                   |     | 92 (65.3)  |      |      |      |      |      |      |      |
| Hypertension                 |                            | 141 | 77 (54.6)  |      |      |      |      |      |      |      |
| Cerebrovascular disease      |                            | 141 | 8 (5.7)    |      |      |      |      |      |      |      |
| Diabetes                     |                            | 141 | 50 (35.5)  |      |      |      |      |      |      |      |
| Thrombo-embolic disease      |                            | 141 | 6 (4.3)    |      |      |      |      |      |      |      |
| COPD                         |                            | 141 | 16 (11.4)  |      |      |      |      |      |      |      |
| Former TB                    |                            | 141 | 2 (1.4)    |      |      |      |      |      |      |      |
| Former Aspergillosis         |                            | 141 | 1 (0.7)    |      |      |      |      |      |      |      |
| HIV                          |                            | 141 | 2 (1.4)    |      |      |      |      |      |      |      |
| Obesity                      |                            | 120 |            |      |      |      |      |      |      |      |
|                              | Normal (BMI < 25)          |     | 17 (14.2)  |      |      |      |      |      |      |      |
|                              | Overweight (25 ≤ BMI < 30) |     | 48 (40.0)  |      |      |      |      |      |      |      |
|                              | Obesity (BMI ≥ 30)         |     | 55 (45.8)  |      |      |      |      |      |      |      |
| Cardiac disease              |                            | 141 |            |      |      |      |      |      |      |      |
|                              | No                         |     | 102 (72.3) |      |      |      |      |      |      |      |
|                              | Coronary heart disease     |     | 17 (12.1)  |      |      |      |      |      |      |      |
|                              | Non-coronary heart failure |     | 1 (0.7)    |      |      |      |      |      |      |      |
|                              | AF/Flutter                 |     | 9 (6.4)    |      |      |      |      |      |      |      |
|                              | Malignant arrhythmia       |     | 1 (0.7)    |      |      |      |      |      |      |      |
|                              | Hypertensive cardiopathy   |     | 2 (1.4)    |      |      |      |      |      |      |      |
|                              | Prosthetic valve           |     | 1 (0.7)    |      |      |      |      |      |      |      |
|                              | Other                      |     | 3 (2.1)    |      |      |      |      |      |      |      |
|                              | Several                    |     | 5 (3.6)    |      |      |      |      |      |      |      |
| Smoking                      |                            | 121 |            |      |      |      |      |      |      |      |
|                              | No                         |     | 71 (58.7)  |      |      |      |      |      |      |      |
|                              | Former                     |     | 41 (33.9)  |      |      |      |      |      |      |      |
|                              | Active                     |     | 9 (7.4)    |      |      |      |      |      |      |      |
| Alcoholism                   |                            | 121 |            |      |      |      |      |      |      |      |
|                              | No                         |     | 109 (90.1) |      |      |      |      |      |      |      |
|                              | Former                     |     | 7 (5.8)    |      |      |      |      |      |      |      |
|                              | Active                     |     | 5 (4.1)    |      |      |      |      |      |      |      |
| Lung disease other than COPD |                            | 141 |            |      |      |      |      |      |      |      |
|                              | No                         |     | 109 (77.3) |      |      |      |      |      |      |      |
|                              | Asthma                     |     | 12 (8.5)   |      |      |      |      |      |      |      |
|                              | OSAHS                      |     | 15 (10.6)  |      |      |      |      |      |      |      |
|                              | Sarcoidosis                |     | 1 (0.7)    |      |      |      |      |      |      |      |
|                              | Vasculitis                 |     | 1 (0.7)    |      |      |      |      |      |      |      |

| Variable                    | Categories                                 | N   | N (%)      | Mean | SD | Min | Q1 | Med | Q3 | Max |
|-----------------------------|--------------------------------------------|-----|------------|------|----|-----|----|-----|----|-----|
| CKD                         | PHT                                        |     | 1 (0.7)    |      |    |     |    |     |    |     |
|                             | Asbestosis                                 |     | 2 (1.4)    |      |    |     |    |     |    |     |
|                             |                                            | 141 |            |      |    |     |    |     |    |     |
|                             | No (GFR > 60)                              |     | 130 (92.2) |      |    |     |    |     |    |     |
|                             | Yes, without ERP                           |     | 10 (7.1)   |      |    |     |    |     |    |     |
| Liver disease               | Haemodialysis                              |     | 1 (0.7)    |      |    |     |    |     |    |     |
|                             |                                            | 141 |            |      |    |     |    |     |    |     |
|                             | No                                         |     | 129 (91.5) |      |    |     |    |     |    |     |
|                             | Cirrhosis                                  |     | 2 (1.4)    |      |    |     |    |     |    |     |
|                             | Hepatitis B                                |     | 3 (2.1)    |      |    |     |    |     |    |     |
| Neoplasia                   | Hepatitis C                                |     | 2 (1.4)    |      |    |     |    |     |    |     |
|                             | Other hepatitis                            |     | 5 (3.6)    |      |    |     |    |     |    |     |
|                             |                                            | 141 |            |      |    |     |    |     |    |     |
|                             | No                                         |     | 130 (92.2) |      |    |     |    |     |    |     |
|                             | Former (> 5 years)                         |     | 3 (2.1)    |      |    |     |    |     |    |     |
| Malignant hemopathy         | Recent (< 5 years)                         |     | 6 (4.3)    |      |    |     |    |     |    |     |
|                             | Active                                     |     | 1 (0.7)    |      |    |     |    |     |    |     |
|                             | Other                                      |     | 1 (0.7)    |      |    |     |    |     |    |     |
|                             |                                            | 141 |            |      |    |     |    |     |    |     |
|                             | No                                         |     | 136 (96.5) |      |    |     |    |     |    |     |
| Benign hemopathy            | Lymphoma                                   |     | 3 (2.1)    |      |    |     |    |     |    |     |
|                             | Multiple myeloma                           |     | 2 (1.4)    |      |    |     |    |     |    |     |
|                             |                                            | 141 |            |      |    |     |    |     |    |     |
|                             | No                                         |     | 138 (97.9) |      |    |     |    |     |    |     |
|                             | MGUS                                       |     | 2 (1.4)    |      |    |     |    |     |    |     |
| Auto-immune disease         | Thalassemia                                |     | 1 (0.7)    |      |    |     |    |     |    |     |
|                             |                                            | 141 |            |      |    |     |    |     |    |     |
|                             | None                                       |     | 129 (91.5) |      |    |     |    |     |    |     |
|                             | RA                                         |     | 2 (1.4)    |      |    |     |    |     |    |     |
|                             | PMR                                        |     | 1 (0.7)    |      |    |     |    |     |    |     |
| Immunodeficiency            | ANCA vasculitis                            |     | 1 (0.7)    |      |    |     |    |     |    |     |
|                             | Connectivitis                              |     | 1 (0.7)    |      |    |     |    |     |    |     |
|                             | BID                                        |     | 2 (1.4)    |      |    |     |    |     |    |     |
|                             | Thyroiditis                                |     | 1 (0.7)    |      |    |     |    |     |    |     |
|                             | Sarcoidosis                                |     | 1 (0.7)    |      |    |     |    |     |    |     |
| Immunosuppressive treatment | ILD                                        |     | 1 (0.7)    |      |    |     |    |     |    |     |
|                             | Skin disease                               |     | 1 (0.7)    |      |    |     |    |     |    |     |
|                             | ITP                                        |     | 1 (0.7)    |      |    |     |    |     |    |     |
|                             |                                            | 141 |            |      |    |     |    |     |    |     |
|                             | No                                         |     | 139 (98.6) |      |    |     |    |     |    |     |
|                             | Splenectomy                                |     | 1 (0.7)    |      |    |     |    |     |    |     |
|                             | AIDS                                       |     | 1 (0.7)    |      |    |     |    |     |    |     |
|                             |                                            | 141 |            |      |    |     |    |     |    |     |
|                             | No                                         |     | 132 (93.6) |      |    |     |    |     |    |     |
|                             | Chronic corticosteroid therapy (EORTC)     |     | 1 (0.7)    |      |    |     |    |     |    |     |
|                             | Chronic corticosteroid therapy (non-EORTC) |     | 3 (2.1)    |      |    |     |    |     |    |     |
|                             | Rituximab                                  |     | 1 (0.7)    |      |    |     |    |     |    |     |
|                             | Mycophenolate mofetil                      |     | 1 (0.7)    |      |    |     |    |     |    |     |
|                             | Methotrexate                               |     | 2 (1.4)    |      |    |     |    |     |    |     |
|                             | Combination                                |     | 1 (0.7)    |      |    |     |    |     |    |     |

AIDS = acquired immunodeficiency syndrome; AF = atrial fibrillation; ANCA = antineutrophil cytoplasm antibody; BID = bowel inflammatory disease; BMI = body mass index; CKD = chronic kidney disease; COPD = chronic obstructive pulmonary disease;

EORTC = European Organization for Research and Treatment of Cancer; ERP = extrarenal purification; GFR = glomerular filtration rate; HIV = human immunodeficiency virus; ILD = interstitial lung disease; ITP = idiopathic thrombocytopenic purpura; Med = median; MGUS = monoclonal gammopathy of unknown significance; OSAHS = obstructive sleep apnea-hypopnoea syndrome; PHT = pulmonary hypertension; PMR = polymyalgia rheumatica; Q1 = first quartile; Q3 = third quartile; RA = rheumatoid arthritis; SD = standard deviation; TB = tuberculosis
