# Supplementary material for: Incidence and Risk Factors of COVID-19-Associated Pulmonary Aspergillosis in Intensive Care Unit—A Monocentric Retrospective Observational Study
Source: MDPI journal article supplement (doi:10.3390/pathogens10111370), 2021-10-22
Supplement: s1 [file s1]

**Table S2.** Respiratory support and COVID-19 treatment administered.

| Variable                   | Categories                  | N   | N (%)      | Mean | SD  | Min | Q1  | Med | Q3  | Max  |
|----------------------------|-----------------------------|-----|------------|------|-----|-----|-----|-----|-----|------|
| <b>Respiratory support</b> |                             | 141 |            |      |     |     |     |     |     |      |
|                            | Oxygen prongs/mask          |     | 35 (24.8)  |      |     |     |     |     |     |      |
|                            | NIV                         |     | 5 (3.6)    |      |     |     |     |     |     |      |
|                            | MV                          |     | 88 (62.4)  |      |     |     |     |     |     |      |
|                            | VV ECMO                     |     | 11 (7.8)   |      |     |     |     |     |     |      |
|                            | AV ECMO                     |     | 2 (1.4)    |      |     |     |     |     |     |      |
| <b>COVID-19 treatment</b>  |                             |     |            |      |     |     |     |     |     |      |
| Antibiotics at admission   |                             | 140 |            |      |     |     |     |     |     |      |
|                            | No                          |     | 23 (16.4)  |      |     |     |     |     |     |      |
|                            | Amoxicillin/clavulanic acid |     | 106 (75.7) |      |     |     |     |     |     |      |
|                            | Other                       |     | 11 (7.9)   |      |     |     |     |     |     |      |
| AZT and HCQ                |                             | 140 |            |      |     |     |     |     |     |      |
|                            | No                          |     | 91 (65.0)  |      |     |     |     |     |     |      |
|                            | AZT                         |     | 3 (2.1)    |      |     |     |     |     |     |      |
|                            | HCQ                         |     | 9 (6.4)    |      |     |     |     |     |     |      |
|                            | AZT + HCQ                   |     | 37 (26.4)  |      |     |     |     |     |     |      |
| Remdesivir                 |                             | 141 | 5 (3.6)    |      |     |     |     |     |     |      |
| DXM (and duration in days) |                             | 141 | 91 (64.5)  | 8.6  | 1.8 | 0.0 | 9.0 | 9.0 | 9.0 | 11.0 |
| Tocilizumab                |                             | 141 | 2 (1.4)    |      |     |     |     |     |     |      |
| Siltuximab                 |                             | 141 | 1 (0.7)    |      |     |     |     |     |     |      |
| Anakinra                   |                             | 141 | 4 (2.8)    |      |     |     |     |     |     |      |
| Plasma                     |                             | 141 | 6 (4.3)    |      |     |     |     |     |     |      |
| Other corticosteroids      |                             | 141 | 3 (2.1)    |      |     |     |     |     |     |      |

AV = arteriovenous; AZT = azithromycin; DXM = dexamethasone; ECMO = extracorporeal membrane oxygenation; HCQ = hydroxychloroquine; Med = median; MV = mechanical ventilation; NIV = non-invasive ventilation; Q1 = first quartile; Q3 = third quartile; SD = Standard deviation; VV = venovenous
