# Supplementary material for: Incidence and Risk Factors of COVID-19-Associated Pulmonary Aspergillosis in Intensive Care Unit—A Monocentric Retrospective Observational Study
Source: MDPI journal article supplement (doi:10.3390/pathogens10111370), 2021-10-22
Supplement: s1 [file s1]

**Table S1.** Demographic characteristic and comorbidities of the population

| Variable                     | Categories                 | N   | N (%)      | Mean | SD   | Min  | Q1   | Med  | Q3   | Max  |
|------------------------------|----------------------------|-----|------------|------|------|------|------|------|------|------|
| Age (years)                  |                            | 141 |            | 62.2 | 12.5 | 18.0 | 56.0 | 64.0 | 70.0 | 87.0 |
| BMI (kg/m <sup>2</sup> )     |                            | 120 |            | 30.4 | 6.1  | 21.2 | 26.1 | 29.0 | 33.0 | 57.8 |
|                              | [20; 25[                   |     | 17 (14.2)  |      |      |      |      |      |      |      |
|                              | [25; 30[                   |     | 48 (40.0)  |      |      |      |      |      |      |      |
|                              | [30; 35[                   |     | 36 (30.0)  |      |      |      |      |      |      |      |
|                              | [35; 40[                   |     | 13 (10.8)  |      |      |      |      |      |      |      |
|                              | ≥ 40                       |     | 6 (5.0)    |      |      |      |      |      |      |      |
| Sex                          |                            | 141 |            |      |      |      |      |      |      |      |
|                              | Men                        |     | 102 (72.3) |      |      |      |      |      |      |      |
|                              | Women                      |     | 39 (27.7)  |      |      |      |      |      |      |      |
| Wave                         |                            | 141 |            |      |      |      |      |      |      |      |
|                              | 1st wave                   |     | 49 (34.7)  |      |      |      |      |      |      |      |
|                              | 2nd wave                   |     | 92 (65.3)  |      |      |      |      |      |      |      |
| Hypertension                 |                            | 141 | 77 (54.6)  |      |      |      |      |      |      |      |
| Cerebrovascular disease      |                            | 141 | 8 (5.7)    |      |      |      |      |      |      |      |
| Diabetes                     |                            | 141 | 50 (35.5)  |      |      |      |      |      |      |      |
| Thrombo-embolic disease      |                            | 141 | 6 (4.3)    |      |      |      |      |      |      |      |
| COPD                         |                            | 141 | 16 (11.4)  |      |      |      |      |      |      |      |
| Former TB                    |                            | 141 | 2 (1.4)    |      |      |      |      |      |      |      |
| Former Aspergillosis         |                            | 141 | 1 (0.7)    |      |      |      |      |      |      |      |
| HIV                          |                            | 141 | 2 (1.4)    |      |      |      |      |      |      |      |
| Obesity                      |                            | 120 |            |      |      |      |      |      |      |      |
|                              | Normal (BMI < 25)          |     | 17 (14.2)  |      |      |      |      |      |      |      |
|                              | Overweight (25 ≤ BMI < 30) |     | 48 (40.0)  |      |      |      |      |      |      |      |
|                              | Obesity (BMI ≥ 30)         |     | 55 (45.8)  |      |      |      |      |      |      |      |
| Cardiac disease              |                            | 141 |            |      |      |      |      |      |      |      |
|                              | No                         |     | 102 (72.3) |      |      |      |      |      |      |      |
|                              | Coronary heart disease     |     | 17 (12.1)  |      |      |      |      |      |      |      |
|                              | Non-coronary heart failure |     | 1 (0.7)    |      |      |      |      |      |      |      |
|                              | AF/Flutter                 |     | 9 (6.4)    |      |      |      |      |      |      |      |
|                              | Malignant arrhythmia       |     | 1 (0.7)    |      |      |      |      |      |      |      |
|                              | Hypertensive cardiopathy   |     | 2 (1.4)    |      |      |      |      |      |      |      |
|                              | Prosthetic valve           |     | 1 (0.7)    |      |      |      |      |      |      |      |
|                              | Other                      |     | 3 (2.1)    |      |      |      |      |      |      |      |
|                              | Several                    |     | 5 (3.6)    |      |      |      |      |      |      |      |
| Smoking                      |                            | 121 |            |      |      |      |      |      |      |      |
|                              | No                         |     | 71 (58.7)  |      |      |      |      |      |      |      |
|                              | Former                     |     | 41 (33.9)  |      |      |      |      |      |      |      |
|                              | Active                     |     | 9 (7.4)    |      |      |      |      |      |      |      |
| Alcoholism                   |                            | 121 |            |      |      |      |      |      |      |      |
|                              | No                         |     | 109 (90.1) |      |      |      |      |      |      |      |
|                              | Former                     |     | 7 (5.8)    |      |      |      |      |      |      |      |
|                              | Active                     |     | 5 (4.1)    |      |      |      |      |      |      |      |
| Lung disease other than COPD |                            | 141 |            |      |      |      |      |      |      |      |
|                              | No                         |     | 109 (77.3) |      |      |      |      |      |      |      |
|                              | Asthma                     |     | 12 (8.5)   |      |      |      |      |      |      |      |
|                              | OSAHS                      |     | 15 (10.6)  |      |      |      |      |      |      |      |
|                              | Sarcoidosis                |     | 1 (0.7)    |      |      |      |      |      |      |      |
|                              | Vasculitis                 |     | 1 (0.7)    |      |      |      |      |      |      |      |

| Variable                    | Categories                                 | N   | N (%)      | Mean | SD | Min | Q1 | Med | Q3 | Max |
|-----------------------------|--------------------------------------------|-----|------------|------|----|-----|----|-----|----|-----|
| CKD                         | PHT                                        |     | 1 (0.7)    |      |    |     |    |     |    |     |
|                             | Asbestosis                                 |     | 2 (1.4)    |      |    |     |    |     |    |     |
|                             |                                            | 141 |            |      |    |     |    |     |    |     |
|                             | No (GFR > 60)                              |     | 130 (92.2) |      |    |     |    |     |    |     |
|                             | Yes, without ERP                           |     | 10 (7.1)   |      |    |     |    |     |    |     |
| Liver disease               | Haemodialysis                              |     | 1 (0.7)    |      |    |     |    |     |    |     |
|                             |                                            | 141 |            |      |    |     |    |     |    |     |
|                             | No                                         |     | 129 (91.5) |      |    |     |    |     |    |     |
|                             | Cirrhosis                                  |     | 2 (1.4)    |      |    |     |    |     |    |     |
|                             | Hepatitis B                                |     | 3 (2.1)    |      |    |     |    |     |    |     |
| Neoplasia                   | Hepatitis C                                |     | 2 (1.4)    |      |    |     |    |     |    |     |
|                             | Other hepatitis                            |     | 5 (3.6)    |      |    |     |    |     |    |     |
|                             |                                            | 141 |            |      |    |     |    |     |    |     |
|                             | No                                         |     | 130 (92.2) |      |    |     |    |     |    |     |
|                             | Former (> 5 years)                         |     | 3 (2.1)    |      |    |     |    |     |    |     |
| Malignant hemopathy         | Recent (< 5 years)                         |     | 6 (4.3)    |      |    |     |    |     |    |     |
|                             | Active                                     |     | 1 (0.7)    |      |    |     |    |     |    |     |
|                             | Other                                      |     | 1 (0.7)    |      |    |     |    |     |    |     |
|                             |                                            | 141 |            |      |    |     |    |     |    |     |
|                             | No                                         |     | 136 (96.5) |      |    |     |    |     |    |     |
| Benign hemopathy            | Lymphoma                                   |     | 3 (2.1)    |      |    |     |    |     |    |     |
|                             | Multiple myeloma                           |     | 2 (1.4)    |      |    |     |    |     |    |     |
|                             |                                            | 141 |            |      |    |     |    |     |    |     |
|                             | No                                         |     | 138 (97.9) |      |    |     |    |     |    |     |
|                             | MGUS                                       |     | 2 (1.4)    |      |    |     |    |     |    |     |
| Auto-immune disease         | Thalassemia                                |     | 1 (0.7)    |      |    |     |    |     |    |     |
|                             |                                            | 141 |            |      |    |     |    |     |    |     |
|                             | None                                       |     | 129 (91.5) |      |    |     |    |     |    |     |
|                             | RA                                         |     | 2 (1.4)    |      |    |     |    |     |    |     |
|                             | PMR                                        |     | 1 (0.7)    |      |    |     |    |     |    |     |
| Immunodeficiency            | ANCA vasculitis                            |     | 1 (0.7)    |      |    |     |    |     |    |     |
|                             | Connectivitis                              |     | 1 (0.7)    |      |    |     |    |     |    |     |
|                             | BID                                        |     | 2 (1.4)    |      |    |     |    |     |    |     |
|                             | Thyroiditis                                |     | 1 (0.7)    |      |    |     |    |     |    |     |
|                             | Sarcoidosis                                |     | 1 (0.7)    |      |    |     |    |     |    |     |
| Immunosuppressive treatment | ILD                                        |     | 1 (0.7)    |      |    |     |    |     |    |     |
|                             | Skin disease                               |     | 1 (0.7)    |      |    |     |    |     |    |     |
|                             | ITP                                        |     | 1 (0.7)    |      |    |     |    |     |    |     |
|                             |                                            | 141 |            |      |    |     |    |     |    |     |
|                             | No                                         |     | 139 (98.6) |      |    |     |    |     |    |     |
|                             | Splenectomy                                |     | 1 (0.7)    |      |    |     |    |     |    |     |
|                             | AIDS                                       |     | 1 (0.7)    |      |    |     |    |     |    |     |
|                             |                                            | 141 |            |      |    |     |    |     |    |     |
|                             | No                                         |     | 132 (93.6) |      |    |     |    |     |    |     |
|                             | Chronic corticosteroid therapy (EORTC)     |     | 1 (0.7)    |      |    |     |    |     |    |     |
|                             | Chronic corticosteroid therapy (non-EORTC) |     | 3 (2.1)    |      |    |     |    |     |    |     |
|                             | Rituximab                                  |     | 1 (0.7)    |      |    |     |    |     |    |     |
|                             | Mycophenolate mofetil                      |     | 1 (0.7)    |      |    |     |    |     |    |     |
|                             | Methotrexate                               |     | 2 (1.4)    |      |    |     |    |     |    |     |
|                             | Combination                                |     | 1 (0.7)    |      |    |     |    |     |    |     |

AIDS = acquired immunodeficiency syndrome; AF = atrial fibrillation; ANCA = antineutrophil cytoplasm antibody; BID = bowel inflammatory disease; BMI = body mass index; CKD = chronic kidney disease; COPD = chronic obstructive pulmonary disease;

EORTC = European Organization for Research and Treatment of Cancer; ERP = extrarenal purification; GFR = glomerular filtration rate; HIV = human immunodeficiency virus; ILD = interstitial lung disease; ITP = idiopathic thrombocytopenic purpura; Med = median; MGUS = monoclonal gammopathy of unknown signification; OSAHS = obstructive sleep apnea-hypopnoea syndrome; PHT = pulmonary hypertension; PMR = polymyalgia rheumatica; Q1 = first quartile; Q3 = third quartile; RA = rheumatoid arthritis; SD = standard deviation; TB = tuberculosis;

**Table S2.** Respiratory support and COVID-19 treatment administered.

| Variable                   | Categories                  | N   | N (%)      | Mean | SD  | Min | Q1  | Med | Q3  | Max  |
|----------------------------|-----------------------------|-----|------------|------|-----|-----|-----|-----|-----|------|
| <b>Respiratory support</b> |                             | 141 |            |      |     |     |     |     |     |      |
|                            | Oxygen prongs/mask          |     | 35 (24.8)  |      |     |     |     |     |     |      |
|                            | NIV                         |     | 5 (3.6)    |      |     |     |     |     |     |      |
|                            | MV                          |     | 88 (62.4)  |      |     |     |     |     |     |      |
|                            | VV ECMO                     |     | 11 (7.8)   |      |     |     |     |     |     |      |
|                            | AV ECMO                     |     | 2 (1.4)    |      |     |     |     |     |     |      |
| <b>COVID-19 treatment</b>  |                             |     |            |      |     |     |     |     |     |      |
| Antibiotics at admission   |                             | 140 |            |      |     |     |     |     |     |      |
|                            | No                          |     | 23 (16.4)  |      |     |     |     |     |     |      |
|                            | Amoxicillin/clavulanic acid |     | 106 (75.7) |      |     |     |     |     |     |      |
|                            | Other                       |     | 11 (7.9)   |      |     |     |     |     |     |      |
| AZT and HCQ                |                             | 140 |            |      |     |     |     |     |     |      |
|                            | No                          |     | 91 (65.0)  |      |     |     |     |     |     |      |
|                            | AZT                         |     | 3 (2.1)    |      |     |     |     |     |     |      |
|                            | HCQ                         |     | 9 (6.4)    |      |     |     |     |     |     |      |
|                            | AZT + HCQ                   |     | 37 (26.4)  |      |     |     |     |     |     |      |
| Remdesivir                 |                             | 141 | 5 (3.6)    |      |     |     |     |     |     |      |
| DXM (and duration in days) |                             | 141 | 91 (64.5)  | 8.6  | 1.8 | 0.0 | 9.0 | 9.0 | 9.0 | 11.0 |
| Tocilizumab                |                             | 141 | 2 (1.4)    |      |     |     |     |     |     |      |
| Siltuximab                 |                             | 141 | 1 (0.7)    |      |     |     |     |     |     |      |
| Anakinra                   |                             | 141 | 4 (2.8)    |      |     |     |     |     |     |      |
| Plasma                     |                             | 141 | 6 (4.3)    |      |     |     |     |     |     |      |
| Other corticosteroids      |                             | 141 | 3 (2.1)    |      |     |     |     |     |     |      |

AV = arteriovenous; AZT = azithromycin; DXM = dexamethasone; ECMO = extracorporeal membrane oxygenation; HCQ = hydroxychloroquine; Med = median; MV = mechanical ventilation; NIV = non-invasive ventilation; Q1 = first quartile; Q3 = third quartile; SD = Standard deviation; VV = venovenous

**Table S3.** Risk factors of CAPA - univariate analysis

| Variable                                      | Category | Non-CAPA<br>(N=132) |            | CAPA<br>(N=9) |          | OR    | 95% CI    | p-value |
|-----------------------------------------------|----------|---------------------|------------|---------------|----------|-------|-----------|---------|
|                                               |          | N                   | N (%)      | N             | N (%)    |       |           |         |
| Hypertension                                  |          | 132                 | 69 (89.6)  | 9             | 8 (10.4) | 7.30  | 0.89-60.1 | 0.064   |
| Cerebrovascular disease                       |          | 132                 | 6 (75.0)   | 9             | 2 (25.0) | 6.00  | 1.02-35.3 | 0.048   |
| Diabetes                                      |          | 132                 | 46 (92.0)  | 9             | 4 (8.0)  | 1.50  | 0.38-5.84 | 0.56    |
| Thrombo-embolic disease                       |          | 132                 | 6 (100.0)  | 9             | 0 (0.0)  | 1.02  | 0.04-24.6 | 0.99    |
| COPD                                          |          | 132                 | 14 (87.5)  | 9             | 2 (12.5) | 2.41  | 0.46-12.7 | 0.30    |
| Former TB                                     |          | 132                 | 2 (100.0)  | 9             | 0 (0.0)  | 2.75  | 0.06-120  | 0.60    |
| Former Aspergillosis                          |          | 132                 | 1 (100.0)  | 9             | 0 (0.0)  | 4.68  | 0.05-447  | 0.51    |
| HIV                                           |          | 132                 | 2 (100.0)  | 9             | 0 (0.0)  | 2.75  | 0.06-120  | 0.60    |
| Obesity                                       |          | 132                 | 53 (96.4)  | 9             | 2 (3.6)  | 0.3   | 0.06-1.57 | 0.16    |
| Cardiac disease (no distinction)              |          | 132                 | 37 (94.9)  | 9             | 2 (5.1)  | 0.73  | 0.15-3.69 | 0.71    |
| Smoking                                       |          | 112                 |            | 9             |          |       |           | 0.92    |
|                                               | No       |                     | 65 (91.6)  |               | 6 (8.4)  | 1.00  |           |         |
|                                               | Former   |                     | 38 (92.7)  |               | 3 (7.3)  | 0.53  | 0.02-11.8 |         |
|                                               | Active   |                     | 9 (100.0)  |               | 0 (0.0)  | 0.92  | 0.23-3.62 |         |
| Alcoholism                                    |          | 113                 |            | 8             |          |       |           | 0.54    |
|                                               | No       |                     | 102 (93.6) |               | 7 (6.4)  | 1.00  |           |         |
|                                               | Former   |                     | 6 (85.7)   |               | 1 (14.3) | 1.24  | 0.05-32.3 |         |
|                                               | Active   |                     | 5 (100.0)  |               | 0 (0.0)  | 3.15  | 0.41-24.2 |         |
| Lung disease other than COPD (no distinction) |          | 132                 | 30 (93.8)  | 9             | 2 (6.3)  | 0.97  | 0.19-4.93 | 0.97    |
| CKD (no distinction)                          |          | 132                 | 10 (90.9)  | 9             | 1 (9.1)  | 1.53  | 0.17-13.4 | 0.70    |
| Liver disease (no distinction)                |          | 132                 | 12 (100.0) | 9             | 0 (0.0)  | 0.51  | 0.03-10.4 | 0.66    |
| Neoplasia (no distinction)                    |          | 132                 | 11 (100.0) | 9             | 0 (0.0)  | 0.56  | 0.03-11.5 | 0.70    |
| Malignant hemopathy (no distinction)          |          | 132                 | 4 (80.0)   | 9             | 1 (20.0) | 4.00  | 0.40-40.1 | 0.24    |
| Benign hemopathy (no distinction)             |          | 132                 | 2 (66.7)   | 9             | 1 (33.3) | 8.13  | 0.66-99.4 | 0.10    |
| Auto-immune disease (no distinction)          |          | 132                 | 11 (91.7)  | 9             | 1 (8.3)  | 1.38  | 0.16-12.0 | 0.77    |
| Immunodeficiency (no distinction)             |          | 132                 | 2 (100.0)  | 9             | 0 (0.0)  | 2.75  | 0.06-120  | 0.60    |
| Immunosuppressive treatment (no distinction)  |          | 132                 | 7 (77.8)   | 9             | 2 (22.2) | 5.10  | 0.89-29.2 | 0.067   |
| Respiratory support (MV vs other)             |          | 132                 | 79 (89.8)  | 9             | 9 (10.2) | 12.8  | 0.71-230  | 0.084   |
| Antibiotic at admission (no distinction)      |          | 131                 | 108 (92.3) | 9             | 9 (7.7)  | 4.12  | 0.22-77.8 | 0.35    |
| AZT and/or HCQ                                |          | 131                 | 49 (100.0) | 9             | 0 (0.0)  | 0.088 | 0.01-1.58 | 0.099   |
| Remdesivir                                    |          | 132                 | 5 (100.0)  | 9             | 0 (0.0)  | 1.22  | 0.05-31.1 | 0.90    |
| DXM                                           |          | 132                 | 82 (90.1)  | 9             | 9 (9.9)  | 11.6  | 0.64-210  | 0.097   |
| Tocilizumab                                   |          | 132                 | 2 (100.0)  | 9             | 0 (0.0)  | 2.75  | 0.06-120  | 0.60    |
| Siltuximab                                    |          | 132                 | 1 (100.0)  | 9             | 0 (0.0)  | 4.68  | 0.05-447  | 0.51    |
| Anakinra                                      |          | 132                 | 4 (100.0)  | 9             | 0 (0.0)  | 1.50  | 0.05-42.1 | 0.81    |
| Convalescent plasma                           |          | 132                 | 5 (83.3)   | 9             | 1 (16.7) | 3.18  | 0.33-30.5 | 0.32    |
| Other corticosteroids                         |          | 132                 | 3 (100.0)  | 9             | 0 (0.0)  | 1.95  | 0.06-63.5 | 0.71    |
| Antibiotics during hospitalization            |          | 132                 | 127 (93.4) | 9             | 9 (6.6)  | 0.82  | 0.03-20.9 | 0.90    |

AZT = azithromycin; CAPA = COVID-19-associated pulmonary aspergillosis; CI = confidence interval; CKD = chronic kidney disease; COPD = chronic obstructive pulmonary disease; DXM = dexamethasone; HIV = human immunodeficiency virus; MV = mechanical ventilation; NA = not assessed; OR = odd ratio; TB = tuberculosis

**Table S4.** Comparison of mortality in COVID-19 patients in ICU  
between the 1st wave and the 2nd wave.

| Wave     | Mortality     | Survival since ICU admission |         |
|----------|---------------|------------------------------|---------|
|          |               | P25 (days + 95%CI)           | p-value |
| 1st wave | 26/49 (53.1%) | 10.0 (6.0-20.0)              | 0.097   |
| 2nd wave | 37/92 (40.2%) | 28.5 (19.0-33.0)             |         |

CI = confidence interval; ICU = intensive care unit

**Figure S1.** Kaplan-Meier Survival curves of COVID-19 patients in ICU during the 1st wave vs the 2nd wave, since hospitalization (a) and since ICU admission (b).

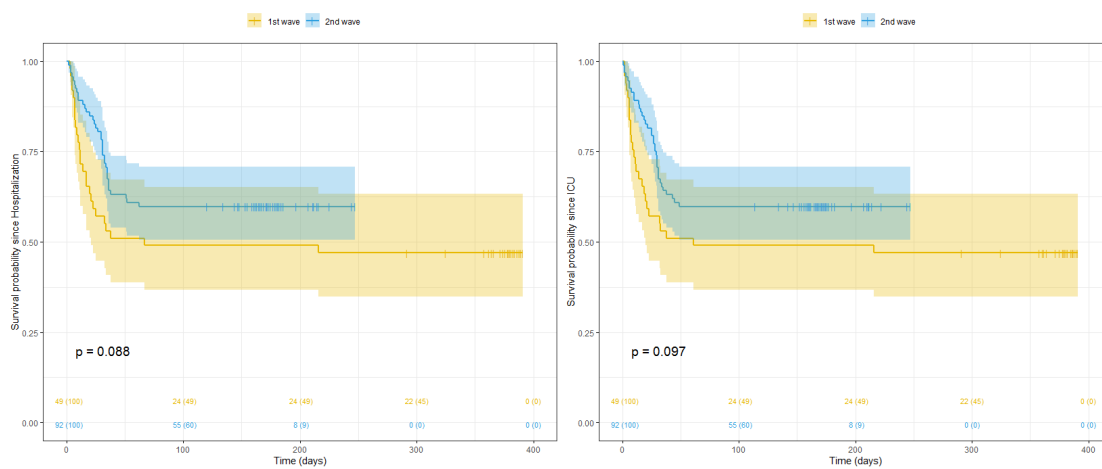

**a)**

**b)**
