# Supplementary material for: Incidence and Risk Factors of COVID-19-Associated Pulmonary Aspergillosis in Intensive Care Unit—A Monocentric Retrospective Observational Study
Source: Pathogens. 2021 Oct 22;10(11):1370. doi: 10.3390/pathogens10111370 (PMC8623919; doi:10.3390/pathogens10111370)
Supplement: Supplementary file 1 [file pathogens-10-01370-s001.zip]

Archive with 6 entries (6 files):
- Supplementary material - Figure S1_Kaplan-Meier Survival curbs of COVID-19 patients in ICU during the 1st wave vs the 2nd wave.pdf
- Supplementary material - Table S1_Demographic characteristic and comorbidities of the population.pdf
- Supplementary material - Table S2_Respiratory support and COVID-19 treatment administered.pdf
- Supplementary material - Table S3_Risk factors of CAPA - univariate analysis.pdf
- Supplementary material - Table S4_ Comparison of mortality in COVID-19 patients in ICU between the 1st wave and the 2nd wave.pdf
- Supplementary material - Tables S1_2_3_4 - Figure S1.pdf
